# Supplementary material
Source: PubMed Central journal article supplement (PMC4186635)
Supplement: Supp_Fig1.pdf [file Supp_Fig1.pdf]

## Supplementary Data

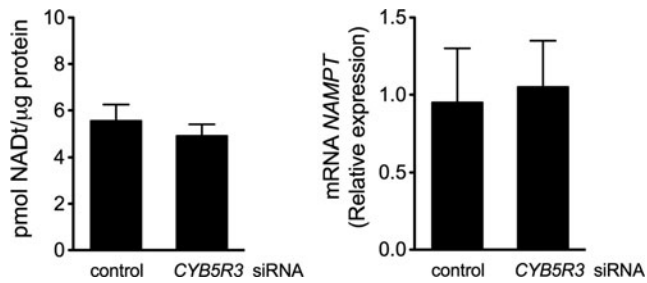

**SUPPLEMENTARY FIG. S1. Effect of CYB5R3 silencing on total NAD and NAMPT levels.** Cytoplasmic levels of pyridine nucleotides (*left panel*) and relative NAMPT mRNA expression (*right panel*) in MRC-5 cells transiently transfected with control and *CYB5R3* siRNAs. NAMPT, nicotinamide phosphoribosyltransferase.
