# Supplementary material
Source: PubMed Central journal article supplement (PMC4186635)
Supplement: Supp_Fig2.pdf [file Supp_Fig2.pdf]

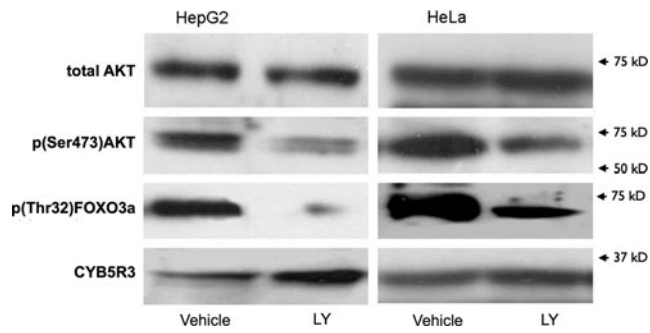

**SUPPLEMENTARY FIG. S2. Evaluation of CYB5R3 expression in HepG2 and HeLa cells.** HepG2 and HeLa cells were treated with LY294002 (LY) for 12 h and then lysed. Western blotting was performed using antibodies against phospho-AKT, phospho-FOXO3a, and CYB5R3. Membranes were reprobbed for total AKT, which served as a loading control. FOXO3a, forkhead box class O 3a; AKT, v-akt murine thymoma viral oncogene homolog 1.
