# Supplementary material
Source: PubMed Central journal article supplement (PMC4186635)
Supplement: Supp_Fig3.pdf [file Supp_Fig3.pdf]

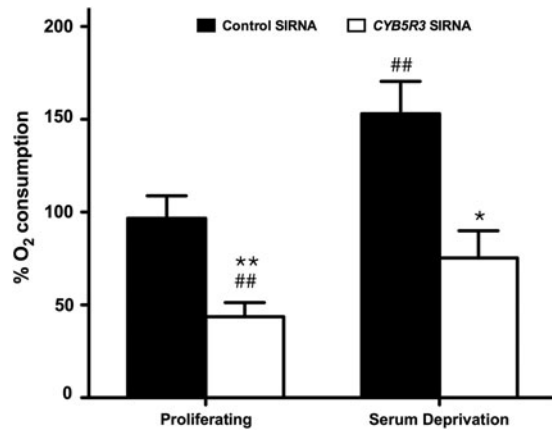

**SUPPLEMENTARY FIG. S3. CYB5R3 deficiency blocked the increase of mitochondrial oxygen consumption stimulated by serum depletion.** Cyanide-sensitive O<sub>2</sub> consumption in control and CYB5R3-silenced MRC-5 cells proliferating or serum depleted during 12 h. Proliferating control *versus* serum-deprived control, proliferating control *versus* proliferating CYB5R3 SiRNA. ## $p < 0.01$ . Serum-deprived control *versus* proliferating CYB5R3 SiRNA. \*\* $p < 0.01$ . Serum-deprived control *versus* serum-deprived CYB5R3 SiRNA. \* $p < 0.05$ .
