# Supplementary material
Source: PubMed Central journal article supplement (PMC4186635)
Supplement: Supp_Fig4.pdf [file Supp_Fig4.pdf]

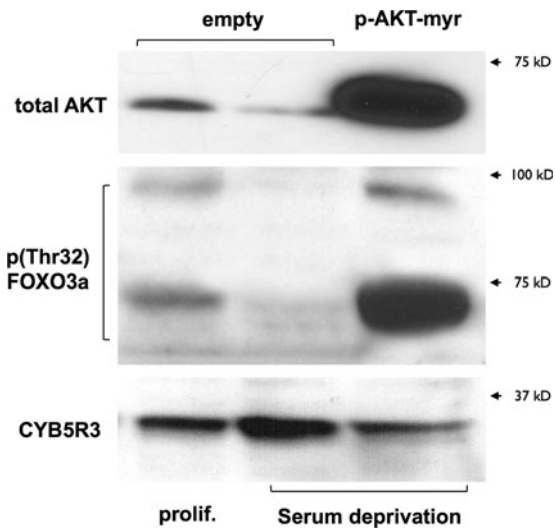

**SUPPLEMENTARY FIG. S4. Role of active Akt in modulating CYB5R3 protein levels.** MRC-5 cells were transiently transfected with an empty vector or a plasmid encoding a constitutively active form of AKT (pAKT-myr). After a 12-h of serum depletion, immunoblot analysis was carried out with the indicated primary antibodies. Blots are representative of at least two independent experiments.
