# Supplementary material
Source: PubMed Central journal article supplement (PMC4186635)
Supplement: Supp_Fig5.pdf [file Supp_Fig5.pdf]

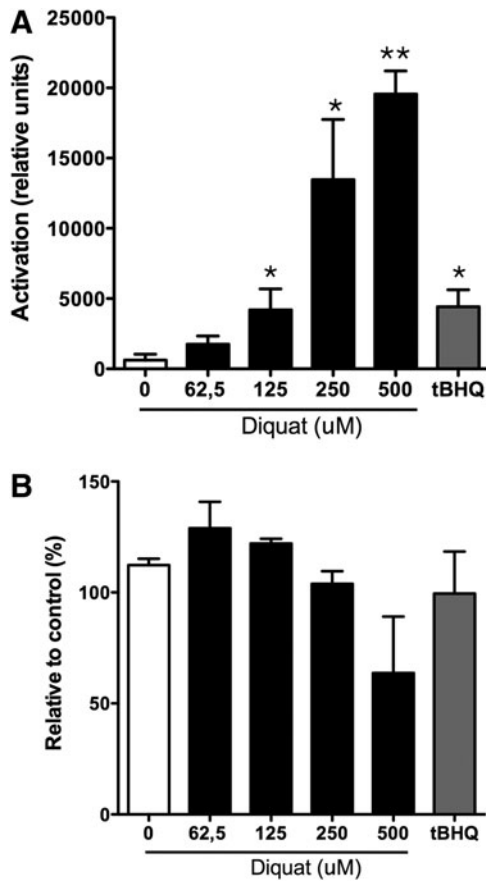

**SUPPLEMENTARY FIG. S5. Activation of Nrf2 by DQ.** (A) Nrf2-ARE assay determining Nrf2-ARE-dependent expression in DQ-treated (0–500  $\mu\text{M}$ ) HepG2-ARE cells. tBHQ (25  $\mu\text{M}$ ) was added as a positive control for NRF2-ARE induction. (B) Cell survival was determined by total reductase activity using MTT assay in DQ-treated (0–500  $\mu\text{M}$ ) HepG2-ARE cells. tBHQ (25  $\mu\text{M}$ ) was added as a positive control. Values are means  $\pm$  SD of at least three assays. \* $p < 0.05$ , \*\* $p < 0.01$ . ARE, antioxidant response elements; tBHQ, tert-butylhydroquinone; DQ, diquat. Nrf2, nuclear factor (erythroid-derived 2)-like2.
