# Supplementary material
Source: PubMed Central journal article supplement (PMC4186635)
Supplement: Supp_Fig6.pdf [file Supp_Fig6.pdf]

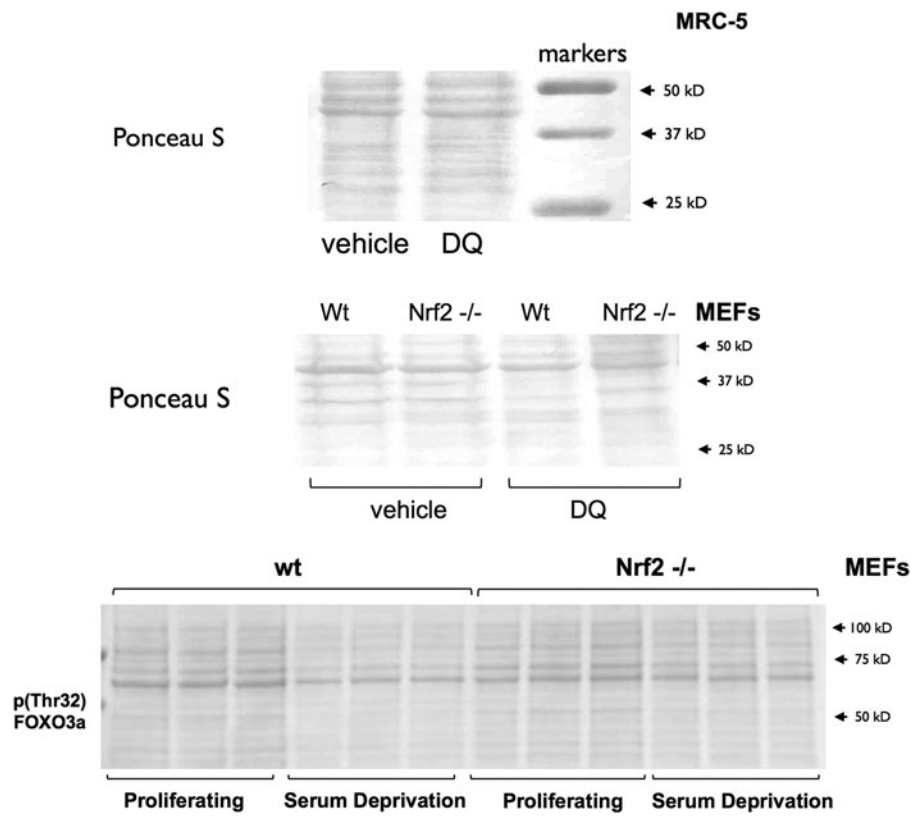

**SUPPLEMENTARY FIG. S6.** Ponceau S staining of the two membranes used for western blotting shown in Figure 8B.
