# Supplementary material
Source: PubMed Central journal article supplement (PMC4186635)
Supplement: Supp_Fig7.pdf [file Supp_Fig7.pdf]

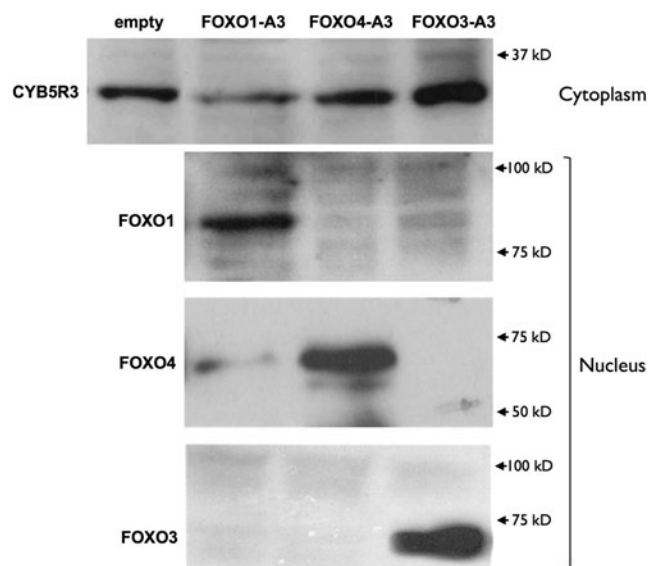

**SUPPLEMENTARY FIG. S7. Relative impact of various FOXO members on CYB5R3 expression.** HeLa cells over-expressing FOXO1-A3 mutant, FOXO4-A3 mutant or FOXO3a-A3 mutant was lysed, and cytosolic and nuclear fractions were processed for western blot analysis. Shown are the cytoplasmic levels of CYB5R3 and nuclear levels of several members of the FOXO family.
