# Supplementary material
Source: PubMed Central journal article supplement (PMC4186635)
Supplement: Supp_Fig8.pdf [file Supp_Fig8.pdf]

-2435 CCTAGGGCTGGAGCTGACATGGTTGGAAGTGCTGGGATCTAACTCTAGTCTCTGAGAGTAGCAAGTGCTTAACTCTGAGTCATCTCCAACCTGTGACTC  
 -2329 TTCCTCTGGACAGTTCAGTAGTCATAGCAACTCTCTGACCCCATGACTCTCCCTAAGATGACAAGATCTGTCTGGATTTTGAATGAGCTTCAACTGTTTTCCAC  
 -2222 TTTGATATCAGTTCTGCTTTTCCAGGTCG**TGAGTCAGCA**TGGCCTGGAGGTCATATATGACCAGTCAGGGGGCCATGCTAGTGTGACGCCTGCTGTGACAGCCAG  
 -2117 TCTTCTTCTGTGGAAGTGCCGTCAAATCTCAAGAGTGAAGTCTCCTCTGCTTACGTTTGACATCTTGCCGGTCGCTTGAAGTATGAGTGCAGACAGGAT  
 -2011 CTGAAGTAGCAGGGAGGTGCCTCAGTGAGGCCCTTGACCCCTGACCCGATGCTATCTTTAGGAAGAGAAGCAACTGTGAGGAGGTTACGCCAGAGAGAAAGGA  
 -1909 GATGGCCAGTCAGTAAGGACCCTAAGGAAGGCAACAGGGAAAGGCTGGGAAGATGGCTCTGATGGTAACAGGAGCTGTGCTCTGCGCAAGCGTGAAGACCA  
 -1807 CAGTTCAGACCTCTGGTACACATTGCATAGGTTCTTACTTCTAGACACAAGAGGAGCCCCATATCCACCCTCACCCCTTTTGAACAAGGCTTACTCTGTAGA  
 -1700 ACAGACTGGCTTGTGCTGTGATCCTCTGCTCAGCCTCCAAGTCTGAGATTAAGGAGAGAATAATACTTAACTGATATTAGATCCAGCCTCATATCCAGGGT  
 -1594 AGTAGGTGCCCTTCCACAGCCTAGCTCCTGATTTTTTTTTTTTTTCACTGTGTTGTTCTTTGAGACGGAGACTCATGTAGCATAGGCTGACCTCAAGTCAATCTGTA  
 -1485 GCCAGGGTCAGATAACCTGAACCCCTGCCTCCTACTATCAAATCTGGAATCACAGATGTGCTGACCATTGCTCCTTATTTATTTATTTGAGACAGGGTCTCTGTG  
 -1378 GTGGTTTGAATAAGAAATGGCCCTCATAGGCACGTGATTTGAACGTTAGTCCCAATTGTGATGTTTGTGGGAGGTACGGAGGTGTGGTCTGTCTGGAA  
 -1273 TGAAGAAATGTGCTGGGGTGGCTTTGAGAGCCTATAGCCTGGCCCACTTCCAGCTCTCTCTCAGGTTCCCACTAAGGTACAGTGTATCTCTCAGCATCCTTCT  
 -1166 CCCCAGCCAGGTTTTCTGCTGCTGTGGCCGGCCATGCTTCCAGCTATAATGGGCTTTATCCTCCTGGAAGTGTGAGACACAATAAACTCCATCTTCCCTAAA  
 -1059 GTTGCCTTCGGTCATGGTGTGTTTACCACAGCAACAGAAAAGTAACTAGCAGTCTCACCGTGTAGCCTGGAACACTCACAGATCCACCTGCCTTCCGGTATTGAA  
 -953 CGCTTGGGTCATCAAGTGTCCGGTATTGAAGAGTTGGTTAATAGTTCTCAATTTTTAGGCAGCAAGTCTTCTCCTCACTGCGCCTCTCAGAGCAGTCTCCAT  
 -846 TCCCTATCTGGCCAGGACCAGGTTGAAGAAAACCCGGAATGCCAGGGACATACGAGTGTATAGAGTATGTGATAGGCTCTGTCTGAGGTCCGGGTACACAG  
 -741 AGAACTGACTGCAGACTCCTGGCTTGGGGAAGCCCCACCATCTAGTGGAAATGGGTACGTGGGCGCAGAGCATCGTGAATAAACAGGCAGGATAACTGAAGCGC  
 -638 TACAAGACCGTTCTGCACTAGTGGCGTCCCTTGGAGGGAGCACAGGGCCAGAGCTGGCCTAGCTAAAGAGGTGACACCTGAACTTTAATCCGGAAGTGGCCTC  
 -534 AGTACGTTTGGAGATTGTTTACAGGAAGGAACGACTGGTTCGAGGCTTGAATAAGGGGAGGGCAGGGCTGTAGCCTGAACTCTGTAGCCAGCGGTGTTGGCA  
 -431 ACACGCCCCGTGAGCGGGTAGAGCCCTGGCCAGCACAACTAGCTCCGGCAGGCTCCCAGGACCGAAGGCTCAGGATT**TGAGAGCCCA**TACGGGGGGCGACAT  
 -329 CTTGTTCTCTTACCAGGACAAAACAGGCCGAGAAGCCACAAGCTACCTCCGAAGCCACACAGAGGCGCCACAGTAGCCAGTCTCTCGCCAGCCTCTTCCGT  
 -225 GCAGCGCGTCAAGCACTCAGCGCGCACTCCCGTCTTACAAGCGGAAGTGGGCGGGGACACTGGGAGTCTCCGCCCTATCCGCCACCTCCGCGCTCTGA  
 -121 CTGGCTCCGAGGGCGTCCCGCTCCGAGGTGTTGAGACCGAGGCGGGTGTGGGGGAGCGCGCGGCTGAGTAGCGGGTGTAGAACCCTGCGTGAGGCC  
 -20 ACCGTCTCTTCTCGCCACCATGGGGGCCAGCTGAGCACGGTAGGCGGATGGGTCTGGGGTCCCAGGCTTGACCGTGGGGATACCGTACGATCCGGGGC  
 + 83 GCCAGCACCGGTTACGAGCCCCGCGCCACCCGGCC

**SUPPLEMENTARY FIG. S8. Nucleotide sequence of the 5'-flanking region of the mouse CYB5R3 gene.** *Shaded boxes* indicate putative binding sites for Nrf2.
